# Supplementary material
Source: publisher site journal article supplement (https://www.dovepress.com/article/209231)

## SUPPLEMENTARY MATERIALS **Supplementary Table 1. List of Approving Institutional Review Boards and the Ethics Committees**

| **Name and address of IEC/IRB: NP28761** | |
| --- | --- |
| Dana-Farber Cancer Institute, 450 Brookline Avenue, OS_229, Boston, MA 02215, USA | |
| Memorial Sloan-Kettering Cancer Centre, 1114 First Avenue, New York, NY 10065, USA | |
| Wayne State University, 87 East, Canfield, Second Floor, Detroit, MI, 48201, USA | |
| Liberty, 1450 S. Woodland Blvd, DeLand, FL, 32720, USA | |
| UC Irvine, Office of Research Administration, 141 Innovation, Suite 250, Irvine, CA 92697-  7600, USA | |
| WIRB, 1019 39th Avenue, SE, Suite 120, Puyallup, WA 98374, USA | |
| WIRB, 3535 Seventh Avenue, Southwest Olympia, WA, 98502, USA | |
| Fox Chase Cancer Centre, 333 Cottman Avenue, Philadelphia, PA 19111, USA | |
| Florida Hospital, 212 E. Winter Park Street, Orlando, FL 32804, USA | |
| Florida Hospital, 901 North Lake Destiny Rd, Suite 400, Orlando, FL 32804, USA | |
| Penn State, Milton S Hershey Medical Centre, 600 Centerview Drive, PO Box 855,Hershey, PA 17033-0855, USA | |
| University of Texas, MD Anderson Cancer Centre, 1400 Pressler Street, Unit 1437, Houston, TX 77030, USA | |
| Medical University of South Carolina, Harborview Office, Tower 19 Hagood Avenue, Suite 601, Charleston, SC 29425, USA | |
| OHSU, 3181 SW Sam, Jackson Park Road, L106-RI Portland, OR 97239, USA | |
| UC San Diego, 9500 Gilman Drive, Mail Code 0052, La Jolla, CA 92093-0052, USA | |
| St. Luke’s University, 801 Ostrum Street, Bethlehem, PA 18015, USA | |
| Wake Forest University, Medical Centre, Blvd Winston-Salem, NC 27157, USA | |
| Office of the Human Research  Protection Program, 11000 Kinross Avenue, Suite 211, Los Angeles, CA 90095, USA | |
| WIRB, 3535 7th Ave SW, Olympia, WA, 98502, USA | |
| Roswell Park Cancer, Elm & Carlton, Streets Buffalo, NY 14263, USA | |
| Orlando Health / Orlando Regional Healthcare System, 141 Kuhl Avenue, Orlando, FL 32806, USA | |
| **Name and address of IEC/IRB: NP28673** |
| The Prince Charles Hospital Human Research Ethics Committee, Prince Charles Hospital, Rode Rd, Chermside, Queensland, 4032, Australia |
| Northern Sydney Local Health District HREC, Level 13, Kolling Building, Royal North Shore  Hospital, Pacific Highway, St Leonards, New South Wales, 2065, Australia |
| Townsville Health Service District HREC – RGO, Townsville Hospital, 100 Angus Smith Drive,  Douglas, Queensland, 4814, Australia |
| Medische Ethische Commissie H.-Hartziekenhuis Roeselare-Menen vzw, Heilig-Hartziekenhuis, Westlaan 123, Roeselare 8800, Belgium |
| Commissie Voor Medische Ethiek - Ziekenhuisnetwerk Antwerpen, Lindendreef 1, ZNA Middelheim, Antwerpen 2020, Belgium |
| Ethisch Comité Universitair Ziekenhuis Gent, De Pintelaan 185, UZ Gent – Ethisch comite 1K4, Ghent B-9000, Belgium |
| Research Ethics Committee, Queen Elizabeth Hospital, 30 Gascoigne Road,  Kowloon, Hong Kong |
| Comitato Etico Locale per la Sperimentazione, Clinica della AUSL 12 di Viareggio, Via Aurelia 335, Lido di Camaiore, Lucca 55043, Italy |
| Comitato Etico Area Vasta Nord Ovest, Via Roma 67, Pisa 56126, Italy |
| Comitato Etico per la Serimentazione Clinica dei  Medicinali della AUSL 2 di Lucca, Via per S. Alessio – Monte San Quirico, Lucca 55100, Italy |
| Comitato Etico Indipendente dell'IRCCS Centro di Riferimento Oncologico di Aviano (PN), Via Franco Gallini 2, Aviano, Pordenone 33081, Italy |
| Comitato Etico dell'IRCCS Istituti Fisioterapici Ospitalieri di Roma, Via Elio Chianesi, 53 Roma 00144, Italy |
| Comitato Etico delle Aziende Sanitarie dell'Umbria di Perugia, Via della Rivoluzione n. 16 Ellera di Corciano, Perugia 06070, Italy |
| Comitato Etico di Area Vasta Centro, Largo Brambilla, 3 Padiglione 15 Piastra  dei Servizi Firenze 50134, Italy |
| Comitato Etico IRCCS Ospedale S. Raffaele di Milano, Via Olgettina, 60 Milano 20132, Italy |
| Comitato Etico Lazio 1, Circonvalazione Gianicolense, 87 Roma 00152, Italy |
| Comitato Etico dell'Azienda Ospedaliera S. Camillo -Forlanini di Roma, Circonvallazione  Gianicolense, 87 Roma 00149, Italy |
| Comitato Etico MIlano Area C, Piazza Ospedale Maggiore 3. Milano 20162, Italy |
| Comitato Etico Unico per la Provincia di Parma, Via Gramsci, 14 Parma 43126, Italy |
| Comitato etico degli IRCCS Istituto Europeo di Oncologia e Centro Cardiologico Monzino, Via Ripamonti , 435 Milano 20141, Italy |
| IRB of Samsung Medical Centre, 81, Irwon-ro, Gangnam-gu Study coordinator room, B3, Annex Building, Samsung, Seoul 06351, Republic of Korea |
| IRB of National Cancer Centre, 323, Ilsan-ro, Ilsandong-gu, Goyang-si Gyeonggi-do 10408, Republic of Korea |
| IRB of Seoul National University Hospital, 101 Daehak-ro, Jongno-gu Seoul 03080, Republic of Korea |
| IRB of Severance Hospital, Yonsei University Health System, No. 31 Office, Paediatric  Oncology Clinic, Yonsei Cancer Hospital, Seoul 03722, Republic of Korea |
| IRB of Asan Medical Centre, 88 Olympic-ro 43-gil, Songpagu, Seoul 05505, Republic of Korea |
| IRB of Seoul National University Bundang Hospital, 172, Dolma-ro, Bundang-gu IRB,  Healthcare Innovation Park, Seongnam-si Gyeonggi-do 13605, Republic of Korea |
| Comité National d'Ethique de Recherche (CNER), 1a-b rue Thomas Edison Strassen L-1445, Luxemburg |
| EC at FSBSI "Russian Oncological Scientific Centre n.a. N.N. Blokhin", 23, Kashirskoe Shosse Moscow 115478, Russia |
| National Healthcare Group Domain Specific Review Board, No. 6 Commonwealth Lane GMTI building Level 6 Singapore 149547, Singapore |
| CEIC Hospital Universitario Ramon y Cajal, Ctra. de Colmenar Viejo, km.9,1 Dpto ODEC Madrid 28034, Spain |
| CEIC Hospital Clinico San Carlos, Servicio Farmacología, Clínica1ª planta, ala Norte,  Puerta G, Madrid 28040, Spain |
| CEIC Complejo Hospitalario Regional de Malaga, Avda. Carlos Haya s/n Secretaria del Comite Etico Málaga 29010, Spain |
| CEIC de Aragón (CEICA), Avda. Gómez Laguna, 25 planta 3, Zaragoza 50009, Spain |
| CEIC Hospital General Universitario de Alicante, c/ Pintor Baeza, 12 3ª planta del edificio  Gris, Alicante 03010, Spain |
| CEIC Hospital Universitari Germans Trias i Pujol, Carretera del Canyet s/n 3ª planta , edificioMaterno-Infantil, Barcelona 08916, Spain |
| CEIC Hospital Universitario 12 de Octubre, Avda. de Córdoba, s/n Área de Gestión de  Proyectos – Unidad Administrativa CEIC, Madrid 28041, Spain |
| CEIC Institut Universitari Dexeus, /Sabino Arna, 5-19 Barcelona 08028, Spain |
| CEIC Hospital Clinic de Barcelona, Villarroel 170 Servicio de Farmacia Barcelona 08036, Spain |
| CEIC Hospital Universitario La Paz, de la Castellana 261 Hospital General -  Planta 8ª, Madrid 28046, Spain |
| Taichung Veterans General Hospital, Institutional Review Board, Room314, 4F Research building, No.1650 Taichung 40705, Taiwan |
| China Medical University Hospital, Institutional Review Board, First Medical Building, No.2 Yuh-Der Road, Taichung 40447, Taiwan |
| National Cheng Kung University Hospital, Institutional Review Board, No.138, Sheng Li Road Tainan 704, Taiwan |
| National Taiwan University Hospital, Research, Ethics Committee, Original Building of Children Medical Centre No.1, Changde St. Taipei City 10048, Taiwan |
| Taipei Veterans General Hospital, Institutional Review Board, 201, Sec. 2, Shih-Pai Rd, Taipei 11217, Taiwan |
| NHS Grampian, Foresterhill House Annexe, Foresterhill, Aberdeen, Aberdeenshire, AB25 2ZB, UK |
| The Royal Marsden NHS Foundation Trust, Clinical Research & Development,  West Wing, Sutton, Surrey, SM2 5PT, UK |
| Sharp Healthcare IRB, 8695 Spectrum Centre Blvd, San Diego, CA 92123, USA |
| WIRB, 1019 39th Avenue SE, Suite 120, Puyallup, WA 98374, USA |
| University Hospitals Case Medical Centre IRB, 11110 Euclid Ave, Cleveland, OH 44106, USA |
| Rush University Medical Centre, 1653 W. Congress Parkway, Rush Annex Building, Chicago, IL 60612, USA |
| UCLA Medical Centre IRB, 11000 Kinross Avenue, Suite 102, Los Angeles, CA 9095, USA |
| Washington University in St. Louis IRB, 660 South Euclid Avenue, Campus Box 8223, St. Louis, MI 63110, USA |
| Committee on Human Research, 3333 California Street, Suite 315, San Francisco,  CA 94118, USA |
| Columbia University IRB, 65 West, 131st Street, New York, NY 10027, USA |
| US Oncology, Inc. IRB, 10101 Woodloch Forest, The Woodlands, TX 77380, USA |
| Florida Hospital IRB, 212 East Winter Park, Orlando, FL 32804, USA |

**Supplementary Table 2**

Demographic and baseline characteristics for the RE populations (by IRC) and confirmed responders in the NP28673 and NP28761 studies

|  | **NP28673 RE  population (n=122)** | **NP28673 confirmed responders (n=62)** | **NP28761 RE  population (n=67)** | **NP28761 confirmed responders (n=35)** |
| --- | --- | --- | --- | --- |
| Median age, years (range) | 53 (22–79) | 52 (22–79) | 54 (29–73) | 54 (29–73) |
| Sex, n (%)  Male  Female | 55 (45.1)  67 (54.9) | 30 (48.4)  32 (51.6) | 33 (49.3)  34 (50.7) | 16 (45.7)  19 (54.3) |
| ECOG PS at baseline, n (%)  0  1  2 | 37 (30.3)  74 (60.7)  11 (9.0) | 23 (37.1)  34 (54.8)  5 (8.1) | 24 (35.8)  37 (55.2)  6 (9.0) | 17 (48.6)  16 (45.7)  2 (5.7) |
| Race, n (%)  Asian  White  Other | 32 (26.2)  81 (66.4)  9 (7.4) | 18 (29.0)  41 (66.1)  3 (4.8) | 6 (9.0)  56 (83.6)  5 (7.5) | 5 (14.3)  29 (82.9)  1 (2.9) |
| Measurable/non-measurable CNS metastases at baseline, n (%)  Yes  No | 74 (60.7)  48 (39.3) | 36 (58.1)  26 (41.9) | 39 (58.2)  28 (41.8) | 19 (54.3)  16 (45.7) |
| Histology, n (%)  Adenocarcinoma  Other | 118 (96.7)  4 (3.3) | 61 (98.4)  1 (1.6) | 62 (92.5)  5 (7.5) | 33 (94.3)  2 (5.7) |
| Prior chemotherapy, n (%)  Yes  No | 96 (78.7)  26 (21.3) | 43 (69.4)  19 (30.6) | 52 (77.6)  15 (22.4) | 30 (85.7)  5 (14.3) |
| Smoking status, n (%)  Former/current smoker  Never smoked | 35 (28.7)  87 (71.3) | 15 (24.2)  47 (75.8) | 27 (40.3)  40 (59.7) | 11 (31.4)  24 (68.6) |

**Abbreviations:**CNS, central nervous system, ECOG PS, Eastern Cooperative Oncology Group performance status, IRC, independent review committee, RE, response evaluable.

**Supplementary Figure 1** Time to first response, progression, and death for patients with confirmed responses in the (A) NP28673 study and (B) NP28761 study

**Abbreviation:** PD, progressive disease


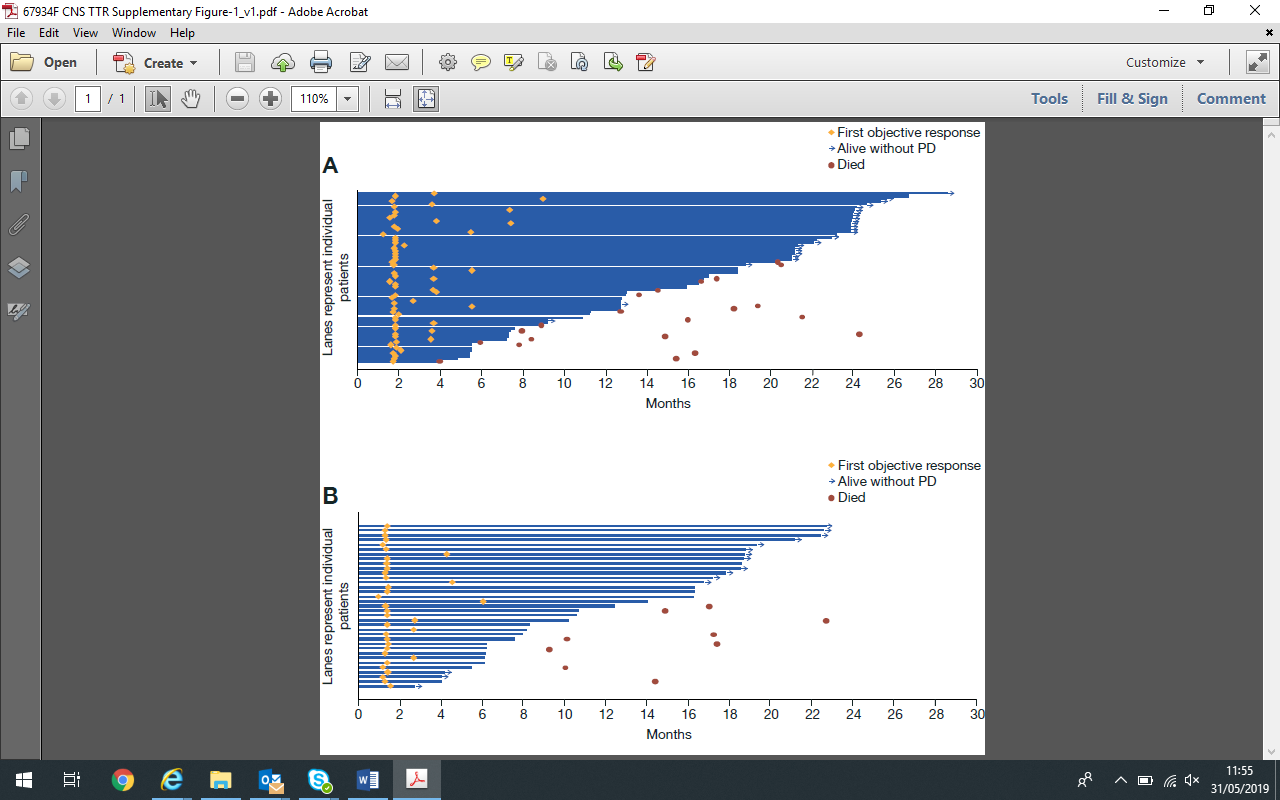


**Supplementary Figure 2** TTCR by IRC in patients with measurable CNS disease at baseline with confirmed CNS responses who had not received prior RT in the (A) NP28673 study and (B) NP28761 study, and in patients with measurable and/or non-measurable CNS disease at baseline with confirmed CNS responses who had not received prior RT in the (C) NP28673 study and (D) NP28761 study

**Abbreviations:** CI, confidence interval, CNS, central nervous system, IRC, independent review committee, NE, not evaluable, RT, radiotherapy, TTCR, time to CNS response.


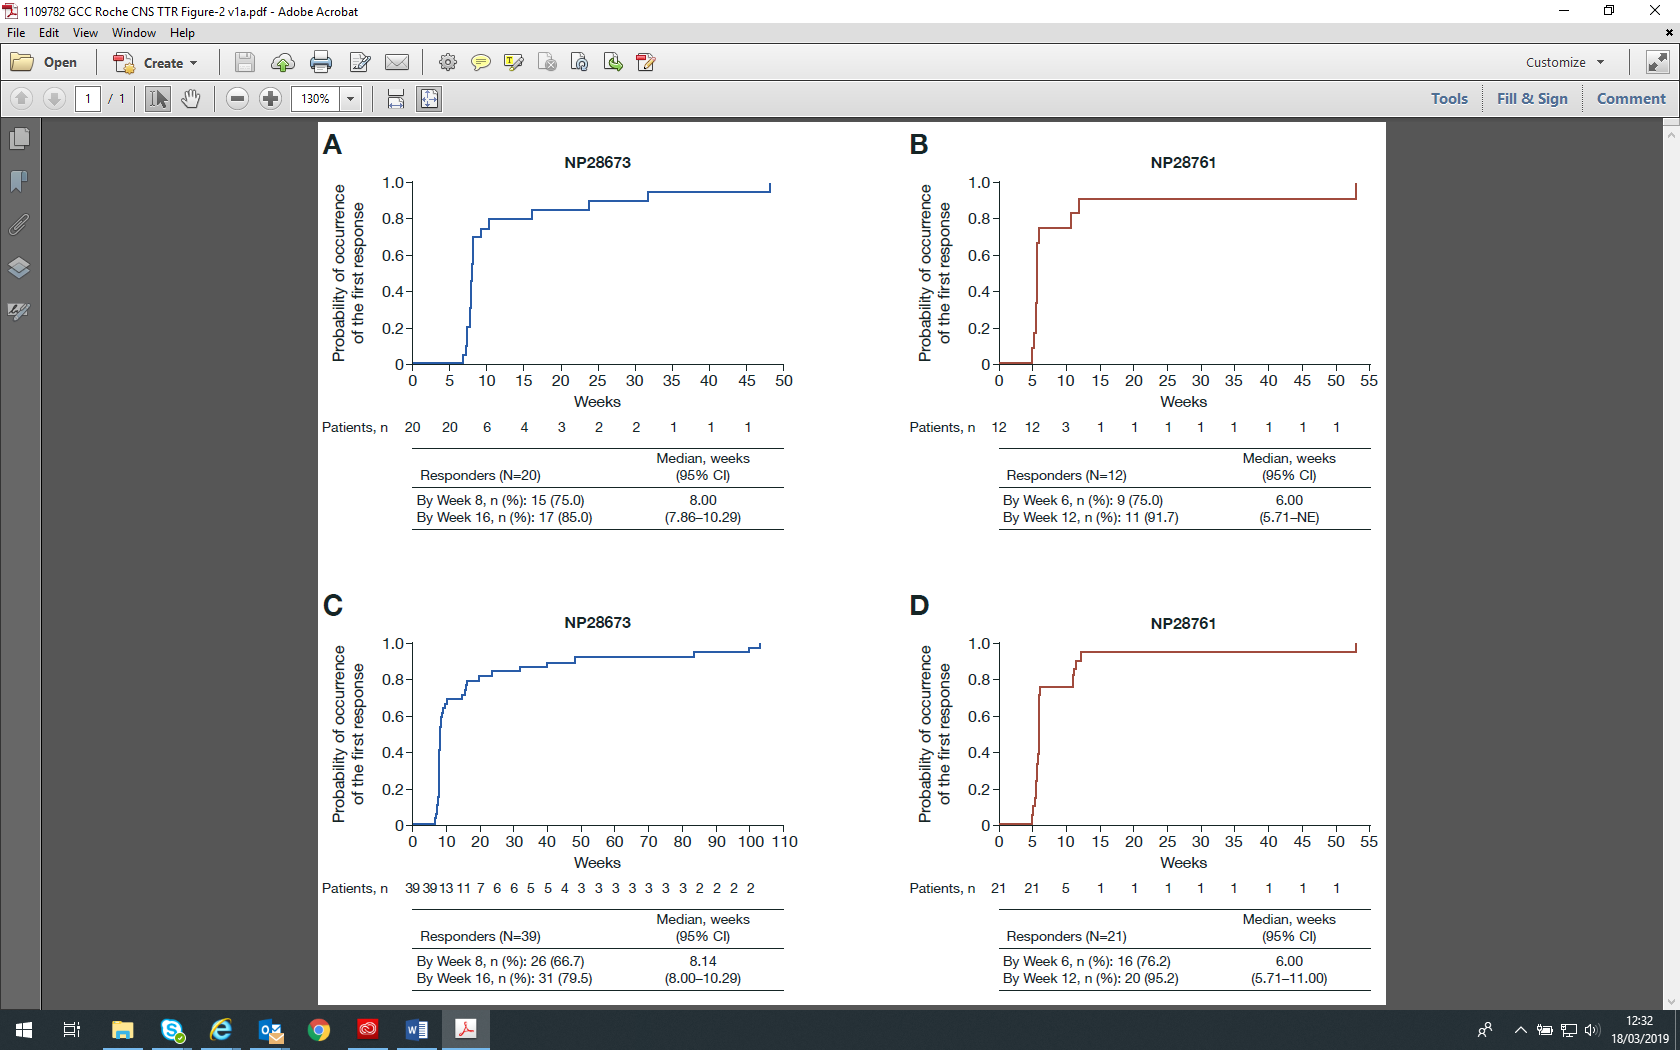

Supplement: Supplementary file 1 [file get_supplementary_file.php]
